# Supplementary material for: Learning to walk with an adaptive gain proportional myoelectric controller for a robotic ankle exoskeleton
Source: PubMed Central journal article supplement (PMC4634144; doi:10.1186/s12984-015-0086-5), 2015-11-04

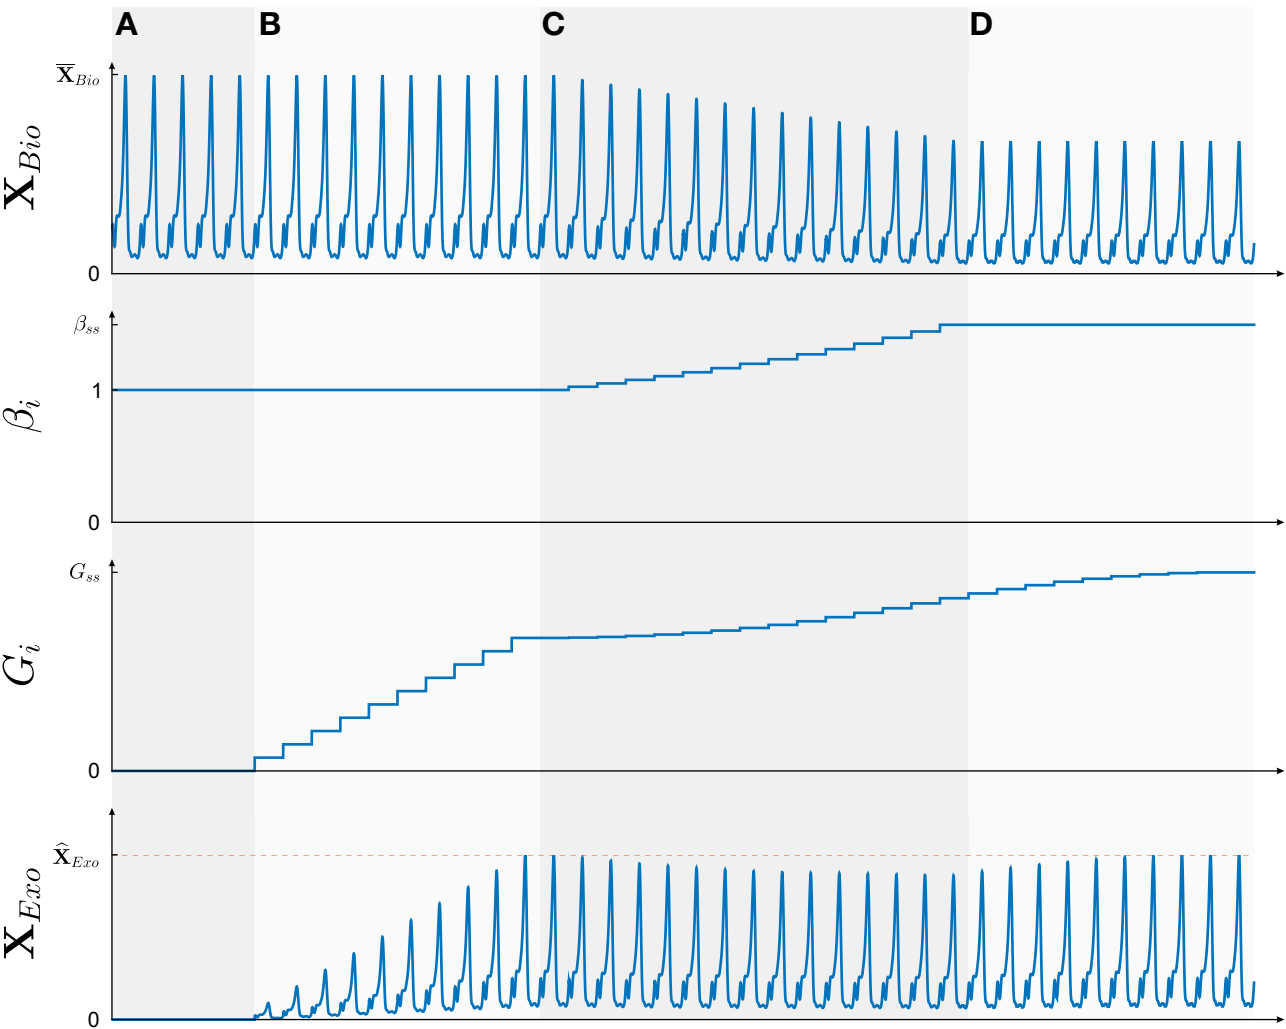

Supplement: 12984_2015_86_MOESM1_ESM.pdf [file 12984_2015_86_MOESM1_ESM.pdf]
