# Supplementary material for: Learning to walk with an adaptive gain proportional myoelectric controller for a robotic ankle exoskeleton
Source: Springer Nature journal article supplement (doi:10.1186/s12984-015-0086-5), 2015-11-04
Supplement: MOESM2 [file 9769848]

**Table A2 Root mean square electromyography for muscles of interest**

|                                        | 1 <sup>st</sup> Unpowered<br>Minutes 7-10<br>■ | Powered<br>Minutes 3-6<br>■ | Powered<br>Minutes 27-30<br>■ | 2 <sup>nd</sup> Unpowered<br>Minutes 7-10<br>■ | Within Session<br>P-Value |
|----------------------------------------|------------------------------------------------|-----------------------------|-------------------------------|------------------------------------------------|---------------------------|
| <b>Soleus r.m.s.</b>                   |                                                |                             |                               |                                                |                           |
| Session 1                              | 1.00 ± 0.00                                    | 0.86 ± 0.04                 | 0.80 ± 0.08                   | 0.93 ± 0.03                                    | 0.073                     |
| Session 2                              | 1.00 ± 0.00                                    | 1.03 ± 0.12                 | 0.93 ± 0.12                   | 0.98 ± 0.03                                    | 0.307                     |
| Session 3                              | 1.00 ± 0.00                                    | 1.04 ± 0.08                 | 0.89 ± 0.08                   | 0.98 ± 0.02                                    | 0.119                     |
| Across Session P-Value                 | 1.000                                          | 0.251                       | 0.478                         | 0.432                                          |                           |
| <b>Tibialis Anterior r.m.s.</b>        |                                                |                             |                               |                                                |                           |
| Session 1                              | 1.00 ± 0.00                                    | 1.20 ± 0.03                 | 1.07 ± 0.05                   | 1.01 ± 0.04                                    | 0.005                     |
| Session 2                              | 1.00 ± 0.00                                    | 1.10 ± 0.05                 | 0.92 ± 0.03                   | 0.99 ± 0.04                                    | 0.032                     |
| Session 3                              | 1.00 ± 0.00                                    | 1.04 ± 0.05                 | 0.89 ± 0.06                   | 1.00 ± 0.04                                    | 0.354                     |
| Across Session P-Value                 | 1.000                                          | 0.130                       | 0.118                         | 0.947                                          |                           |
| <b>Medial Gastrocnemius r.m.s.</b>     |                                                |                             |                               |                                                |                           |
| Session 1                              | 1.00 ± 0.00                                    | 1.05 ± 0.07                 | 0.98 ± 0.09                   | 0.99 ± 0.05                                    | 0.317                     |
| Session 2                              | 1.00 ± 0.00                                    | 1.02 ± 0.11                 | 0.96 ± 0.12                   | 0.98 ± 0.03                                    | 0.783                     |
| Session 3                              | 1.00 ± 0.00                                    | 1.03 ± 0.09                 | 0.94 ± 0.07                   | 0.98 ± 0.02                                    | 0.252                     |
| Across Session P-Value                 | 1.000                                          | 0.885                       | 0.885                         | 0.885                                          |                           |
| <b>Biceps Femoris Long Head r.m.s.</b> |                                                |                             |                               |                                                |                           |
| Session 1                              | 1.00 ± 0.00                                    | 1.12 ± 0.10                 | 0.82 ± 0.05                   | 0.82 ± 0.05                                    | 0.002                     |
| Session 2                              | 1.00 ± 0.00                                    | 1.02 ± 0.10                 | 0.76 ± 0.08                   | 0.80 ± 0.06                                    | 0.039                     |
| Session 3                              | 1.00 ± 0.00                                    | 1.19 ± 0.14                 | 0.83 ± 0.09                   | 0.87 ± 0.04                                    | 0.014                     |
| Across Session P-Value                 | 1.000                                          | 0.115                       | 0.008                         | 0.672                                          |                           |
| <b>Vastus Lateralis r.m.s.</b>         |                                                |                             |                               |                                                |                           |
| Session 1                              | 1.00 ± 0.00                                    | 1.18 ± 0.06                 | 1.02 ± 0.08                   | 0.93 ± 0.02                                    | 0.002                     |
| Session 2                              | 1.00 ± 0.00                                    | 1.15 ± 0.06                 | 1.04 ± 0.11                   | 0.95 ± 0.04                                    | 0.178                     |
| Session 3                              | 1.00 ± 0.00                                    | 1.13 ± 0.06                 | 1.01 ± 0.07                   | 0.99 ± 0.04                                    | 0.127                     |
| Across Session P-Value                 | 1.000                                          | 0.670                       | 0.912                         | 0.427                                          |                           |
| <b>Rectus Femoris r.m.s.</b>           |                                                |                             |                               |                                                |                           |
| Session 1                              | 1.00 ± 0.00                                    | 1.19 ± 0.11                 | 0.91 ± 0.12                   | 0.84 ± 0.06                                    | 0.008                     |
| Session 2                              | 1.00 ± 0.00                                    | 1.02 ± 0.10                 | 0.77 ± 0.05                   | 0.88 ± 0.03                                    | 0.058                     |
| Session 3                              | 1.00 ± 0.00                                    | 0.83 ± 0.09                 | 0.80 ± 0.09                   | 0.90 ± 0.05                                    | 0.350                     |
| Across Session P-Value                 | 1.000                                          | 0.005                       | 0.555                         | 0.373                                          |                           |

Values (means ± s.e.m.) are root mean square (r.m.s.) average from the whole walking stride normalized to the first unpowered condition of the corresponding session.  $P < 0.05$  represents statistical significance.
